## Addendum

**Addendum: Nasal NK/T cell lymphoma presents with long-term nasal blockage and fever: a rare case report and literature review****Hai Zou<sup>1</sup>, Ke-Hua Pan<sup>2</sup>, Liang Wu<sup>3</sup>, Hong-Ying Pan<sup>1</sup>, Ya-Hui Ding<sup>4</sup> and Ming-Hua Zheng<sup>5,6</sup>**<sup>1</sup>Department of Infection Diseases, Zhejiang Provincial People's Hospital, Hangzhou, China<sup>2</sup>Department of Radiology, The First Affiliated Hospital of Wenzhou Medical University, Wenzhou, China<sup>3</sup>Department of Pathology, The First Affiliated Hospital of Wenzhou Medical University, Wenzhou, China<sup>4</sup>Department of Cardiovascular Medicine, Zhejiang Provincial People's Hospital, Hangzhou, China<sup>5</sup>Department of Infection and Liver Diseases, Liver Research Center, The First Affiliated Hospital of Wenzhou Medical University, Wenzhou, China<sup>6</sup>Institute of Hepatology, Wenzhou Medical University, Wenzhou, China**Published:** December 01, 2023**Copyright:** © 2023 Zou et al. This is an open access article distributed under the terms of the [Creative Commons Attribution License](#) (CC BY 4.0), which permits unrestricted use, distribution, and reproduction in any medium, provided the original author and source are credited.**This article has an addendum:** Informed patient consent was obtained for publication of this case report.Original article: Oncotarget. 2016; 7:9613–9617. <https://doi.org/10.18632/oncotarget.7386>
